# Supplementary material for: Oral Intestinal Microbiome Axis in Early-Onset Surgically Resected Colorectal Cancer: A Comparative Observational Study
Source: Research Square preprint supplement (doi:10.21203/rs.3.rs-7453046/v1), 2025-09-23
Supplement: Supplementary file 1 [file 70a950ba3d72461ec1fedbef.docx]

**Supplementary Figures**

**
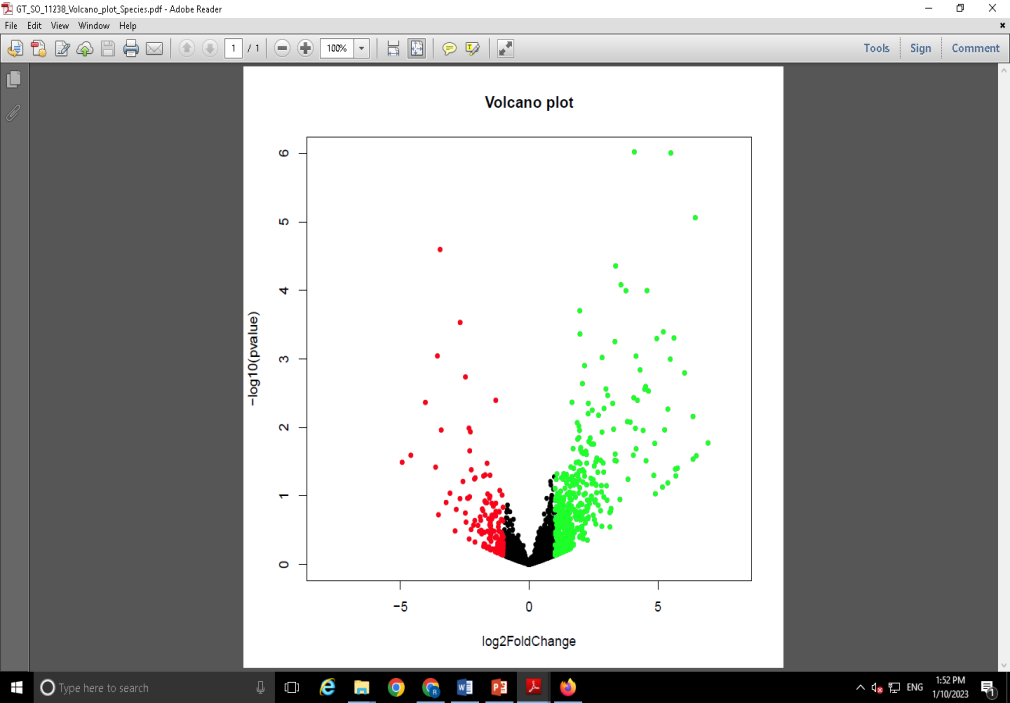
**

SI Figure– 1: Volcano plot representation for differential species expression, this scatter plot shows statistical significance (P value) versus magnitude of fold change [log2fc]. [The green highlighted regions representing up regulated [having log2fc >1], red region is down regulated [having log2fc <1] and neutrally expressed species represented as black [between log2fc -1 to 1].

SI Figure **-**2: Distribution of Oral Hygiene Status Among Study Participants (n=25)

**A**


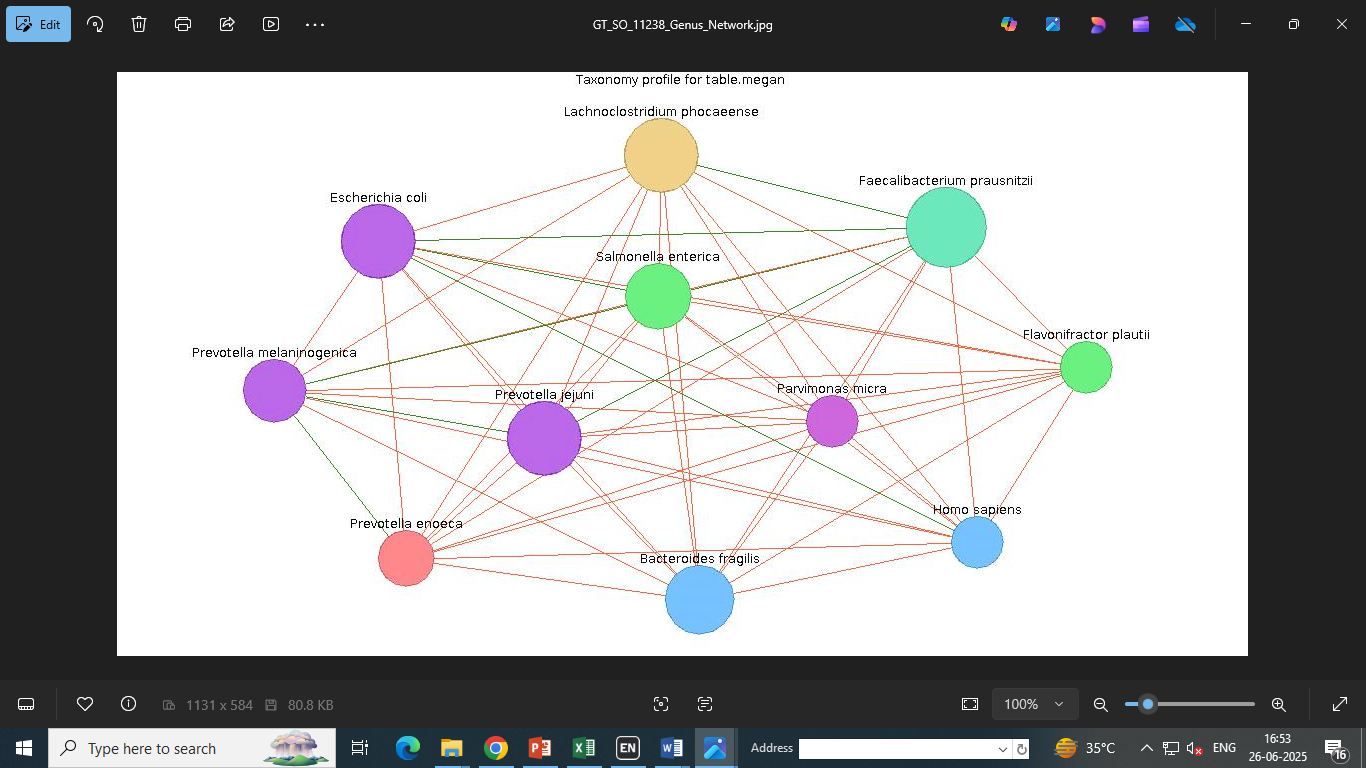


**B**

**
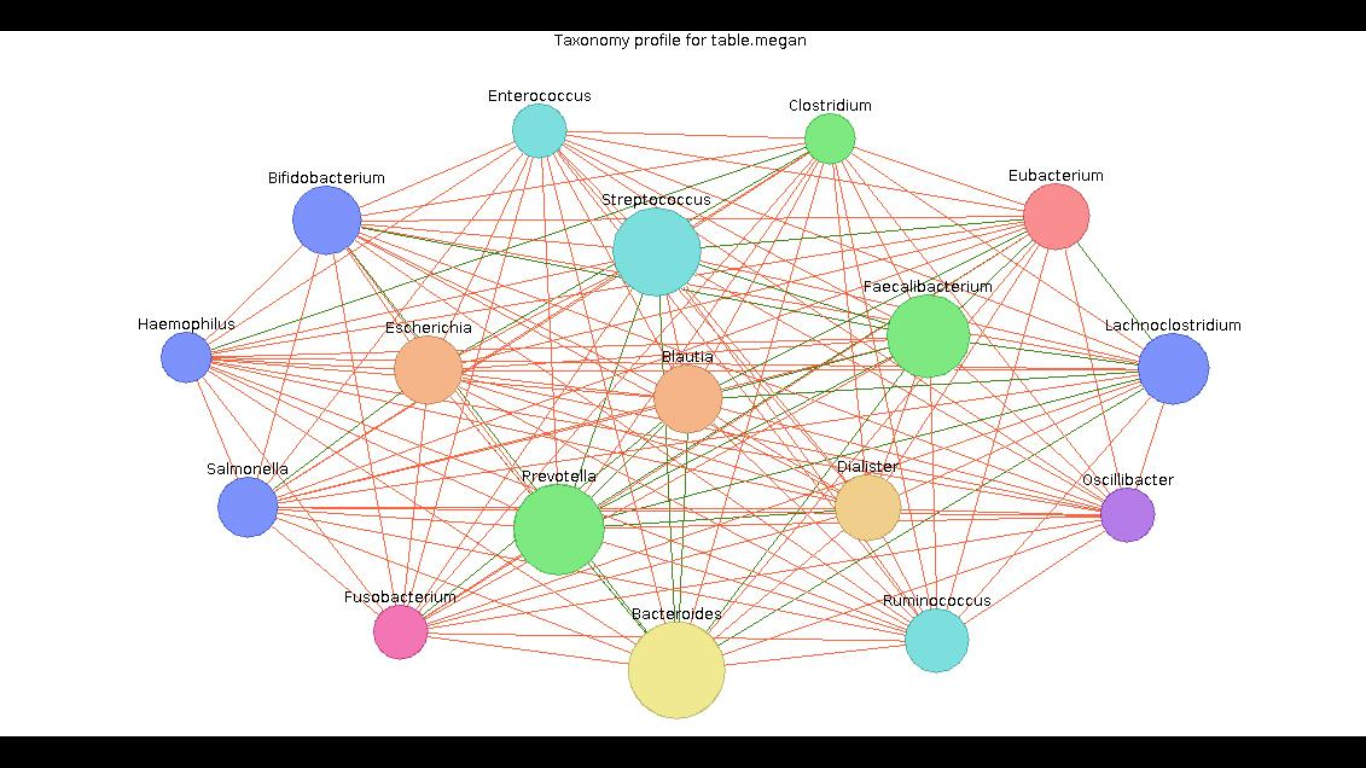
**

SI Figure **-**3: Co-occurrence (crosstalk) network of microbial genera in EOCRC tumor tissue. Nodes represent microbial taxa at the genus level (node size proportional to relative abundance). Edges represent co-occurrence relationships based on Jaccard similarity indices, with width proportional to the similarity score. Only taxa with ≥1% relative abundance and present in 30–90% of samples were included. Network constructed and visualized using MEGAN v6.21.5.


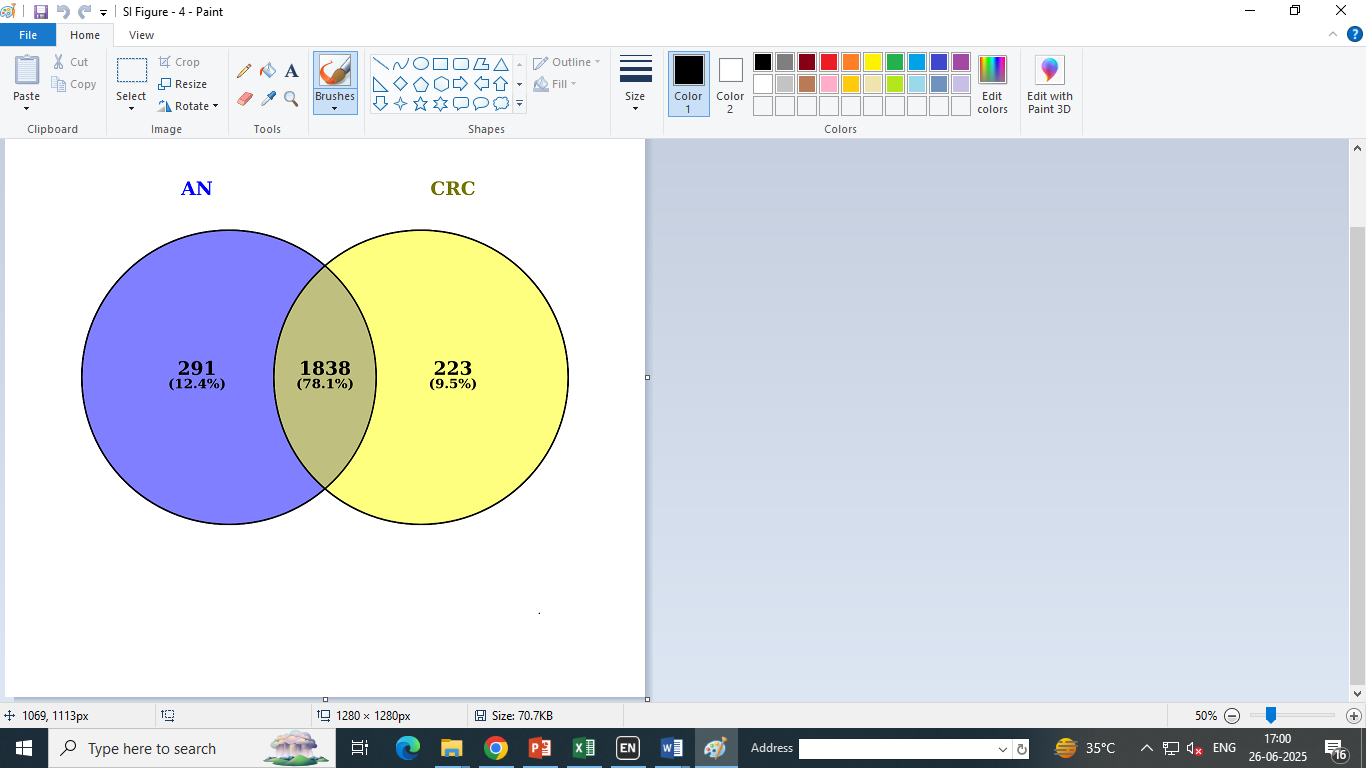


SI Figure **-**4: A Venn diagram, representing the shared and unique OTU's of the microbiome at species level between CRC and adjacent normal


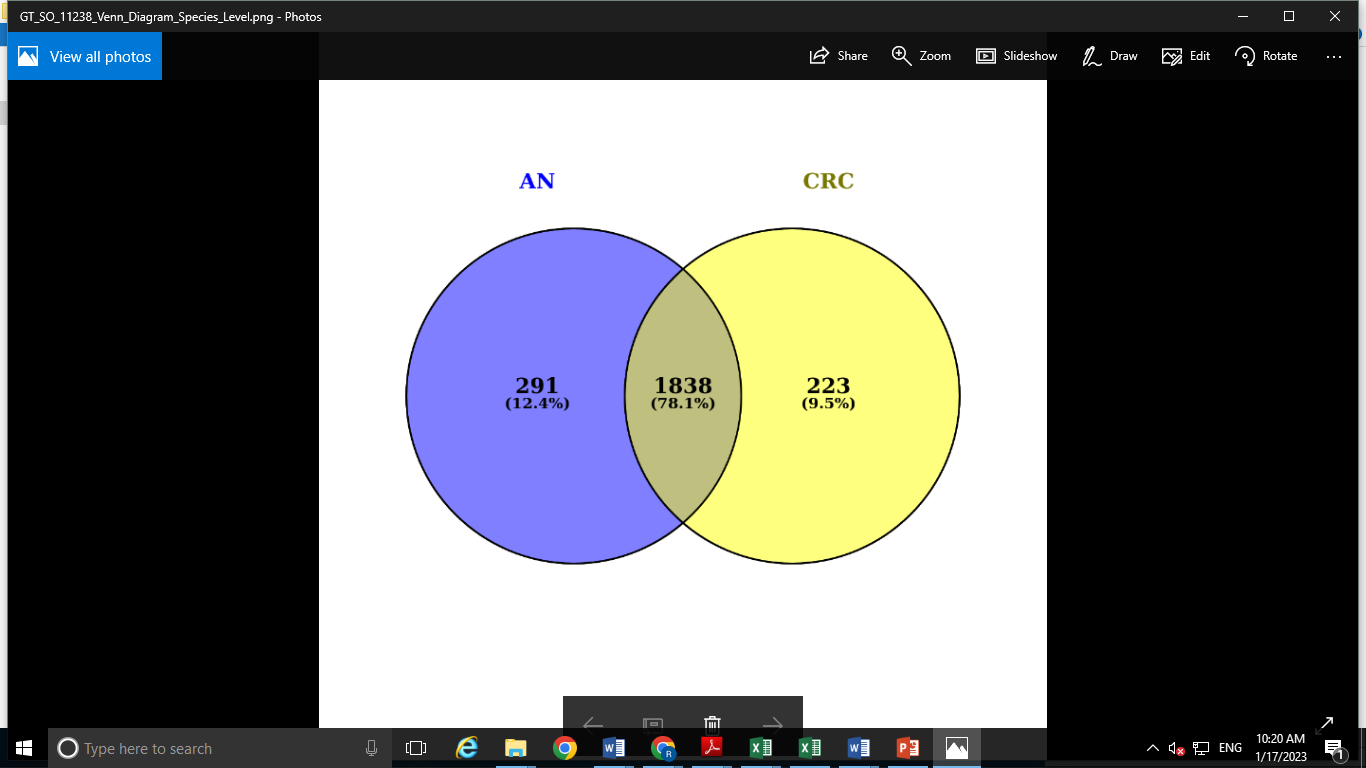


SI Figure **-** 4: A Venn diagram, representing the shared and unique OTU's of the microbiome at species level between CRC and adjacent normal

A


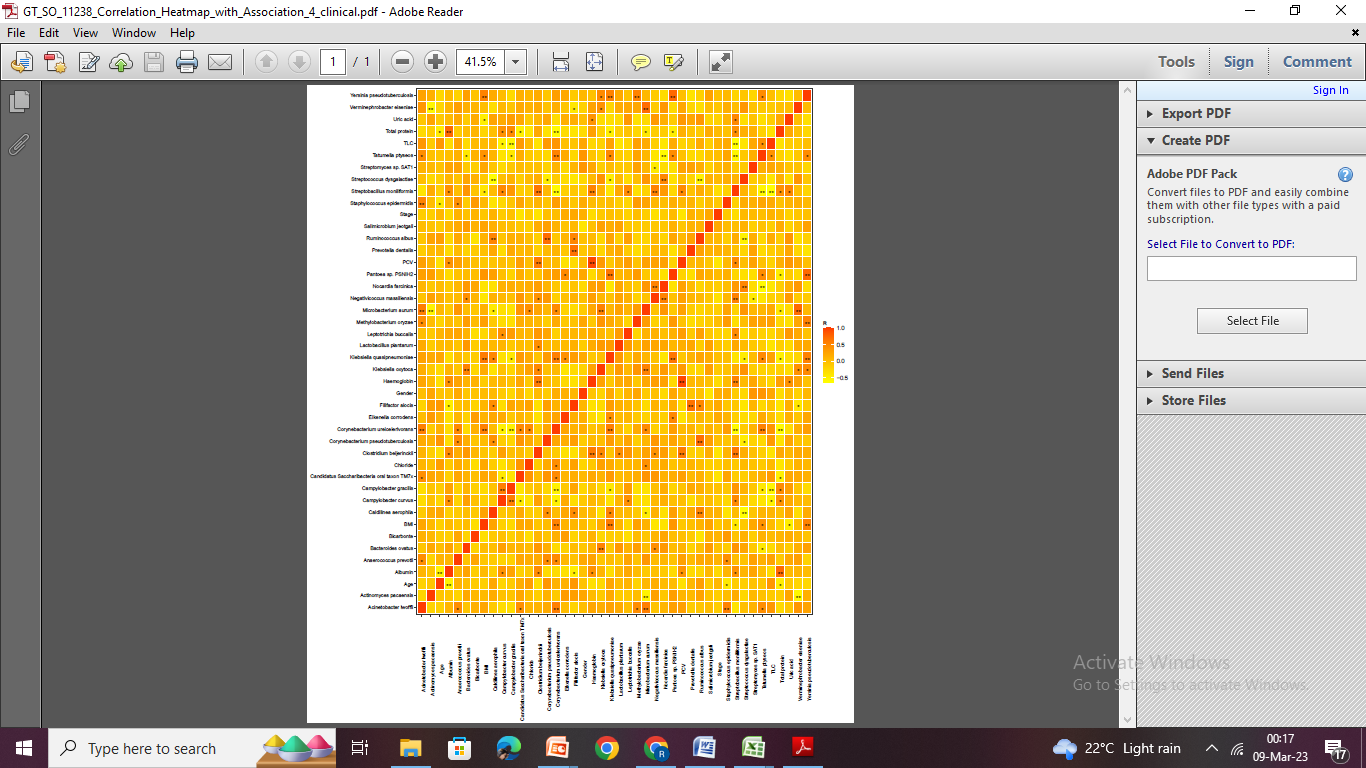


AA


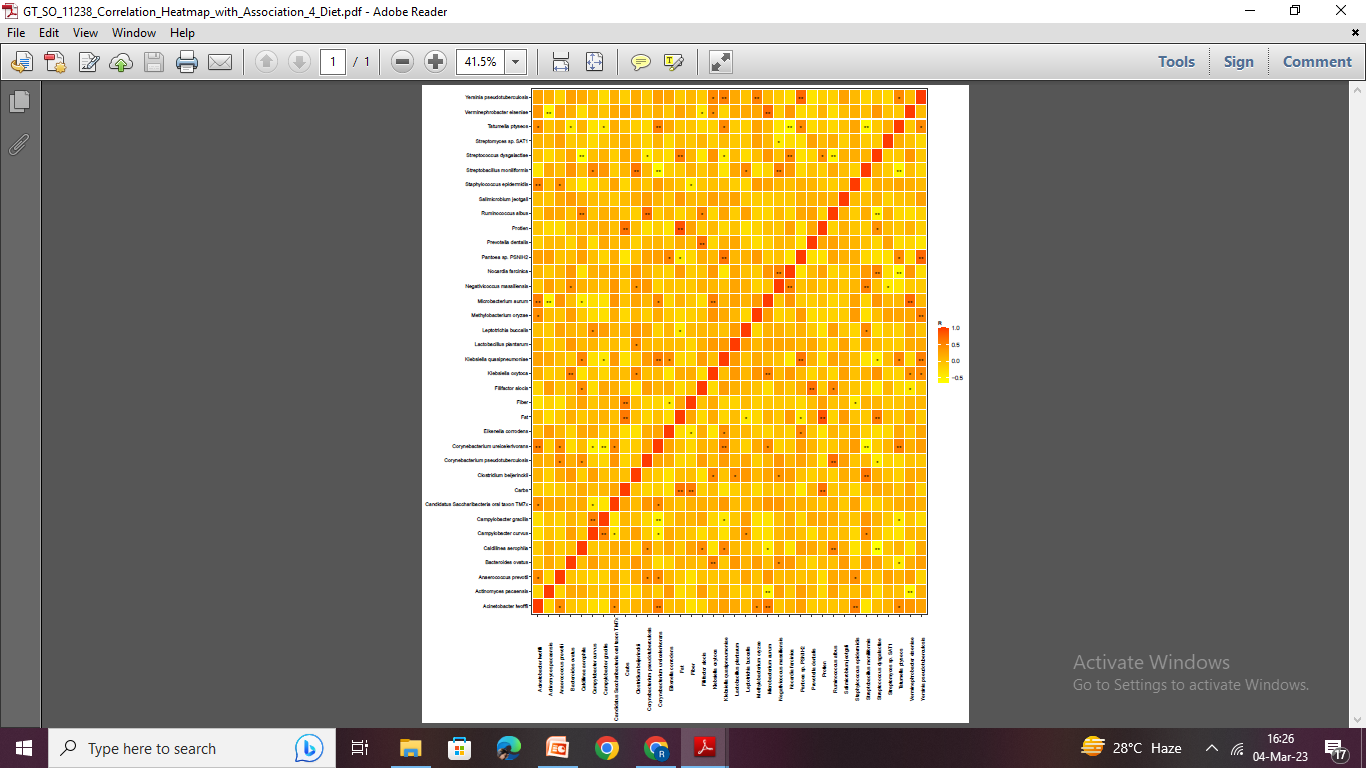


B

1. **SI Figures 5 A and B:** Correlation heatmaps generated using Spearman's correlation method. **A-** illustrates associations between microbial taxa and clinical parameters, while **B-** Depicts correlations with dietary factors (carbohydrate, protein, fat, and fiber). Statistical significance is denoted by asterisks: **p < 0.01 = "**", 0.01 < p < 0.05 = "*", and p ≥ 0.05 is left unmarked. Darker red colors indicate stronger positive correlations, while lighter shades represent weaker or negative correlations.

**Supplementary Tables**

SI Table 1- Distribution of patients according to total oral hygiene index (OHI) score and interpretation

| **Total OHI Score** | **Oral Hygiene Interpretation** | **Number of Patients (n)** |
| --- | --- | --- |
| 0 | Excellent oral hygiene | 1 |
| 1 | Good oral hygiene | 8 |
| 2 | Fair oral hygiene | 10 |
| 3 | Poor oral hygiene | 6 |

SI Table 2- ROC Curve Metrics and Correlation of CRC associated Microbial Species

| **Species** | **AUC** | **Sensitivity** | **Specificity** | **PPV** | **NPV** | **Accuracy** | **P value** | **Correlation** |
| --- | --- | --- | --- | --- | --- | --- | --- | --- |
| *Caldilinea aerophila* | 0.76 | 0.7 | 0.83 | 0.81 | 0.71 | 0.76 | **0.01** | +ve |
| *Filifactor alocis* | 0.6 | 0.53 | 0.91 | 0.88 | 0.65 | 0.72 | **0.03** | +ve |
| *Prevotella dentalis* | 0.51 | 0.69 | 0.5 | 0.6 | 0.6 | 0.6 | 0.42 | +ve |
| *Streptococcus dysgalactiae* | 0.68 | 0.23 | 0.33 | 0.27 | 0.28 | 0.28 | **0.047** | -ve |
| *Leptotrichia buccalis* | 0.59 | 0.08 | 0.91 | 0.5 | 0.48 | 0.48 | 1 | -ve |

SI Table 3 - Significantly Enriched Microbial Species Identified in Tumor Tissue by DESeq2 Analysis

| **S. No.** | **Species** | **log2FoldChange** | **lfcSE** | **stat** | **P value** | **padj** |
| --- | --- | --- | --- | --- | --- | --- |
| 1 | *Negativicoccus massiliensis* | 25.05 | 2.91 | 8.59 | 0.000 | 0.000 |
| 2 | *Leptotrichia buccalis* | 6.45 | 1.45 | 4.45 | 0.000 | 0.001 |
| 3 | *Coryn. pseudotuberculosis* | 4.15 | 1.25 | 3.32 | 0.001 | 0.035 |
| 4 | *Staphylococcus epidermidis* | 4.08 | 0.83 | 4.90 | 0.000 | 0.000 |
| 5 | *Campylobacter gracilis* | 3.81 | 1.44 | 2.64 | 0.008 | 0.135 |
| 6 | *Caldilinea aerophila* | 3.76 | 0.97 | 3.89 | 0.000 | 0.007 |
| 7 | *Tatumella ptyseos* | 3.56 | 0.91 | 3.94 | 0.000 | 0.007 |
| 8 | *Campylobacter curvus* | 3.34 | 1.48 | 2.25 | 0.024 | 0.250 |
| 9 | *Acinetobacter lwoffii* | 3.04 | 1.04 | 2.93 | 0.003 | 0.080 |
| 10 | *Microbacterium aurum* | 2.31 | 0.96 | 2.41 | 0.016 | 0.199 |
| 11 | *Streptomyces sp. SAT1* | 2.15 | 0.67 | 3.23 | 0.001 | 0.041 |
| 12 | *Eikenella corrodens* | 2.10 | 0.93 | 2.26 | 0.024 | 0.250 |
| 13 | *Filifactor alocis* | 2.07 | 0.68 | 3.05 | 0.002 | 0.064 |
| 14 | *Klebsiella quasipneumoniae* | 2.04 | 0.90 | 2.27 | 0.023 | 0.243 |
| 15 | *Anaerococcus prevotii* | 1.98 | 0.93 | 2.12 | 0.034 | 0.285 |
| 16 | *Actinomyces pacaensis* | 1.97 | 0.56 | 3.52 | 0.000 | 0.022 |
| 17 | *Methylobacterium oryzae* | 1.96 | 0.53 | 3.72 | 0.000 | 0.013 |
| 18 | *Coryne. ureicelerivorans* | 1.96 | 0.97 | 2.02 | 0.043 | 0.341 |
| 19 | *Streptobacillus moniliformis* | 1.95 | 0.77 | 2.54 | 0.011 | 0.149 |
| 20 | *Streptococcus dysgalactiae* | 1.93 | 0.74 | 2.59 | 0.010 | 0.148 |
| 21 | *Salimicrobium jeotgali* | 1.82 | 0.85 | 2.14 | 0.033 | 0.282 |
| 22 | *Pantoea sp. PSNIH2* | 1.70 | 0.74 | 2.32 | 0.020 | 0.230 |
| 23 | *Clostridium beijerinckii* | 1.66 | 0.58 | 2.86 | 0.004 | 0.085 |
| 24 | *Candidatus Saccharibacteria* | 1.61 | 0.78 | 2.08 | 0.038 | 0.317 |
| 25 | *Nocardia farcinica* | 1.34 | 0.68 | 1.98 | 0.048 | 0.358 |
| 26 | *Yersinia pseudotuberculosis* | 1.08 | 0.54 | 1.98 | 0.048 | 0.358 |
| 27 | *Bacteroides ovatus* | -1.30 | 0.45 | -2.88 | 0.004 | 0.085 |
| 28 | *Verminephrobacter eiseniae* | -1.71 | 0.87 | -1.97 | 0.049 | 0.362 |
| 29 | *Ruminococcus albus* | -2.31 | 1.01 | -2.29 | 0.022 | 0.238 |
| 30 | *Klebsiella oxytoca* | -2.47 | 0.79 | -3.12 | 0.002 | 0.053 |
| 31 | *Prevotella dentalis* | -2.68 | 0.74 | -3.62 | 0.000 | 0.018 |
| 32 | *Lactobacillus plantarum* | -3.46 | 0.82 | -4.21 | 0.000 | 0.003 |

SI Table 4 - Correlation between clinical parameters and species (p<0.05)

| **Variable 1** | **Variable 2** | **R** | **P** |
| --- | --- | --- | --- |
| Age | *Staphylococcus epidermidis* | -0.41232 | 0.040543 |
| Albumin | *Clostridium beijerinckii* | 0.4694 | 0.017919 |
| *Streptobacillus moniliformis* | 0.416869 | 0.038164 |
| *Campylobacter curvus* | 0.407895 | 0.042964 |
| *Filifactor alocis* | -0.4794 | 0.015315 |
| BMI | *Klebsiella quasipneumoniae* | 0.59273 | 0.001794 |
| *Corynebacterium ureicelerivorans* | 0.553779 | 0.004079 |
| *Tatumella ptyseos* | 0.404357 | 0.044981 |
| *Streptobacillus moniliformis* | -0.39743 | 0.049146 |
| Chloride | *Corynebacterium ureicelerivorans* | 0.454052 | 0.02261 |
| *Microbacterium aurum* | 0.430689 | 0.031615 |
| Haemoglobin | *Streptobacillus moniliformis* | 0.540026 | 0.005328 |
| PCV | *Clostridium beijerinckii* | 0.605081 | 0.001353 |
| *Streptobacillus moniliformis* | 0.484458 | 0.014121 |
| TLC | *Tatumella ptyseos* | 0.407564 | 0.043149 |
| *Campylobacter curvus* | -0.50182 | 0.01059 |
| *Campylobacter gracilis* | -0.55219 | 0.00421 |
| *Streptobacillus moniliformis* | -0.63323 | 0.00068 |
| Total protein | *Streptobacillus moniliformis* | 0.423031 | 0.035122 |
| *Campylobacter curvus* | 0.404089 | 0.045137 |
| *Microbacterium aurum* | -0.40547 | 0.044339 |
| *Pantoea sp. PSNIH2* | -0.46214 | 0.020026 |
| *Candidatus Saccharibacteria oral taxon TM7x* | -0.49059 | 0.012777 |
| *Klebsiella quasipneumoniae* | -0.49342 | 0.012195 |
| *Corynebacterium ureicelerivorans* | -0.60344 | 0.001405 |
| Uric acid | *Streptobacillus moniliformis* | 0.50005 | 0.010913 |

SI Table 5 - Comparison of Patient Dietary Intake with Recommended Nutrient Ranges

| Nutrient content | Normal Range | Mean ± SD |
| --- | --- | --- |
| Calories | 1600 - 2400 (Kcal)/day | 1257 ± 390 |
| Protein | 55 - 60 g/day | 51.3 ± 23.1 |
| Carbohydrates | 225 - 325 g/day | 158.4 ± 38.9 |
| Fat | 44 -77 g/day | 44.3 ± 16.8 |
| Fiber | 30 - 38 g/day | 19.8 ± 5.8 |

SI Table 6: Correlation between Dietary Components and species (p<0.05)

| **Var1** | **Var2** | **R** | **P** |
| --- | --- | --- | --- |
| Fiber | Eikenella corrodens | -0.41 | 0.044 |
| Staphylococcus epidermidis | -0.44 | 0.027 |
| Fat | Pantoea sp. PSNIH2 | -0.4 | 0.046 |
| Streptococcus dysgalactiae | 0.57 | 0.003 |
| Leptotrichia buccalis | -0.41 | 0.039 |
| Protein | Streptococcus dysgalactiae | 0.41 | 0.043 |
